# Supplementary material
Source: PubMed Central journal article supplement (PMC7497659)
Supplement: jp9b10938_si_001.pdf [file jp9b10938_si_001.pdf]

**Supporting Information**

**for**

**Unusual Behavior of Bipolar Molecule, 25-Hydroxycholesterol,  
at the Air/Water Interface – Langmuir Monolayer Approach Complemented  
with Theoretical Calculations**

Anita Wnętrzak<sup>a</sup>, Anna Chachaj-Brekiesz<sup>a</sup>, Jan Kobierski<sup>b</sup>,  
Katarzyna Karwowska<sup>c</sup>, Aneta D. Petelska<sup>c</sup>, Patrycja Dynarowicz-Latka<sup>a</sup>

<sup>a</sup> Faculty of Chemistry, Jagiellonian University, Gronostajowa 2, 30-387 Kraków, Poland

<sup>b</sup> Department of Pharmaceutical Biophysics, Faculty of Pharmacy, Jagiellonian University Medical College, Medyczna 9, 30-688 Kraków, Poland

<sup>c</sup> Faculty of Chemistry, University of Białystok, Ciołkowskiego 1K, 15-425 Białystok, Poland

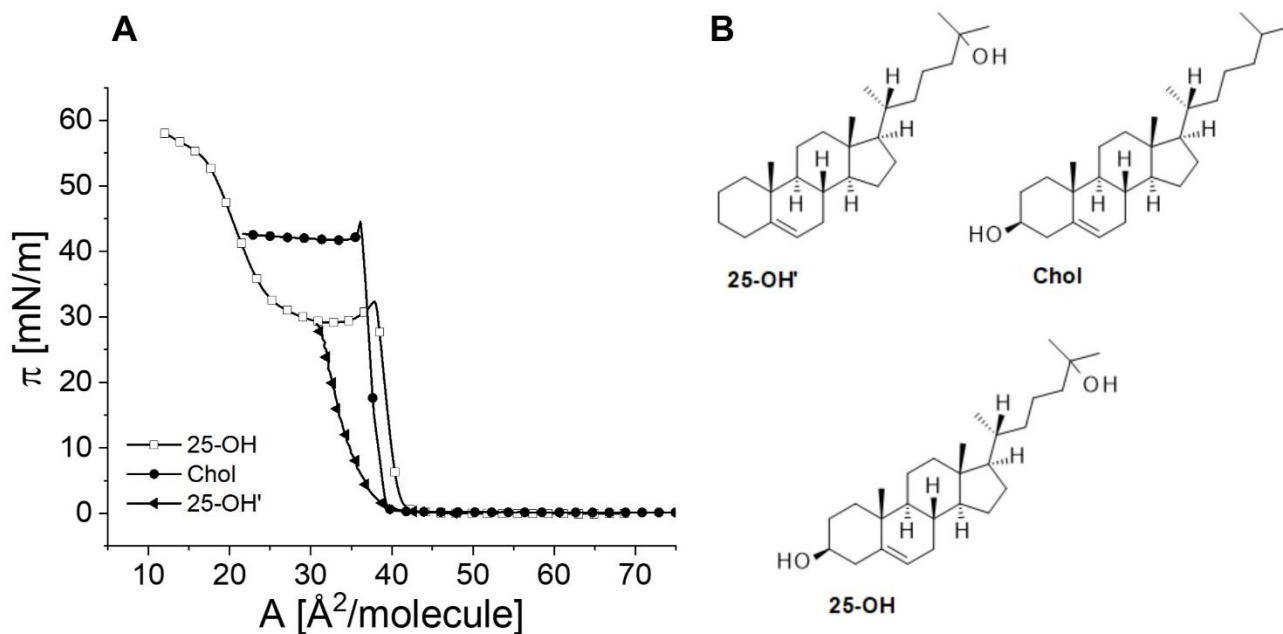

**Figure S1.** Surface pressure-area isotherms (A) and molecular formulas (B) of 25-OH and its homologs. The isotherm for 25-OH' was reconstructed with Origin program, based on the published data [V. Janout, S. Turkyilmaz, M. Wang, Y. Wang, Y. Manaka, S.L. Regen, An upside down view of cholesterol's condensing effect: does surface occupancy play a role? *Langmuir* **2010**, 26, 5316-5318].

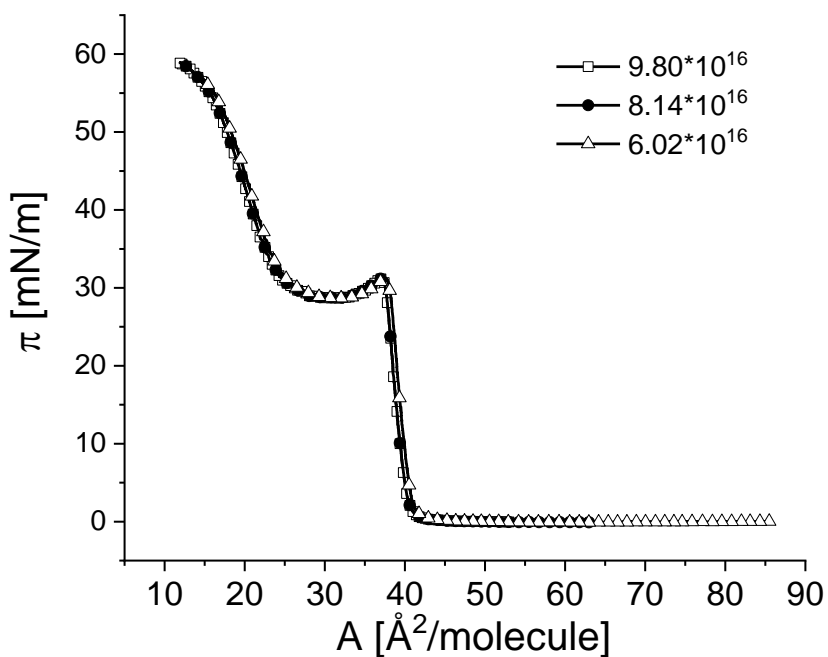

**Figure S2.** Influence of the number of molecules on surface pressure-area isotherms of 25-OH (recorded at 20 °C).

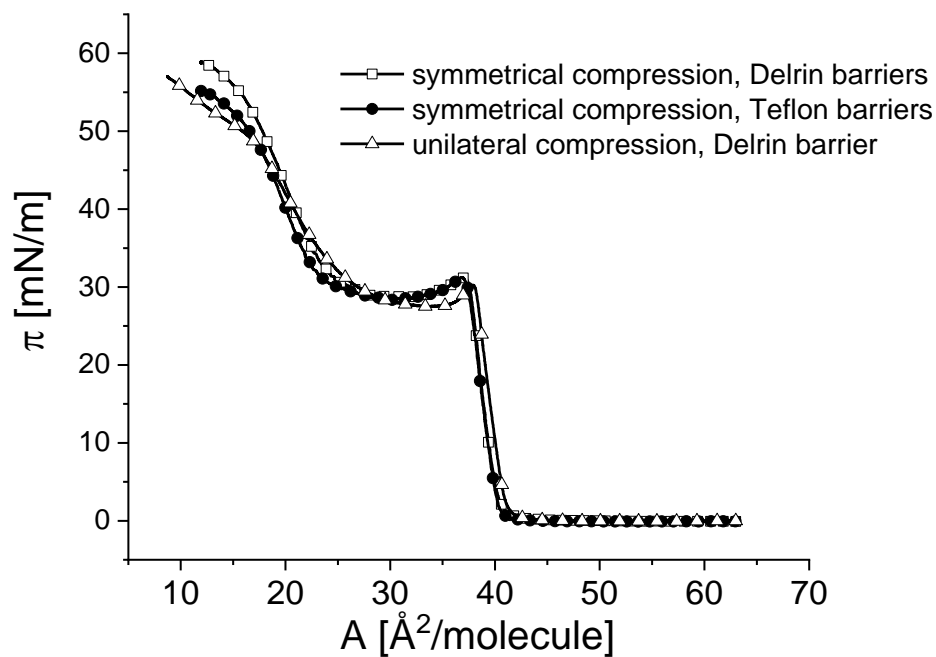

**Figure S3.** Influence of the type of compression (unilateral vs symmetrical) and barrier material (Delrin vs Teflon) on surface pressure-area isotherms of 25-OH (recorded at 20 °C).

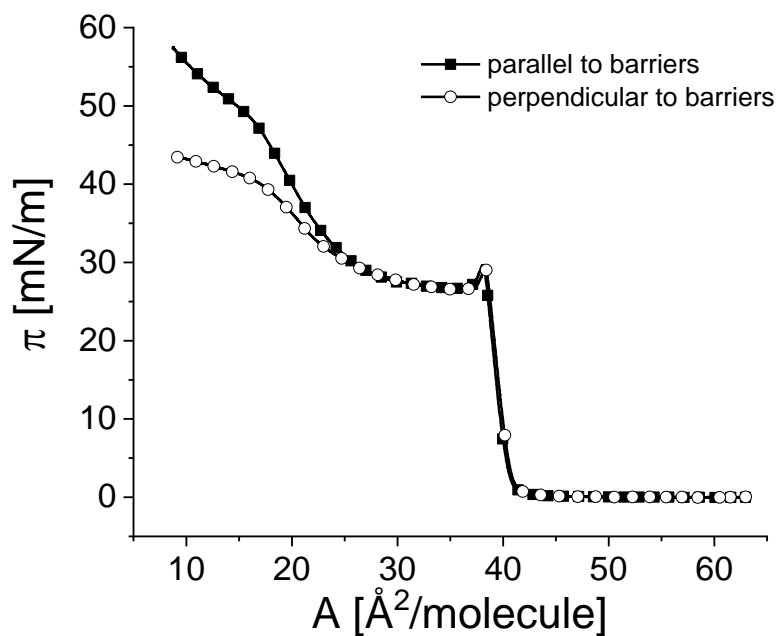

**Figure S4.** Influence of the orientation of Wilhelmy plate in respect to barriers position on surface pressure-area isotherms of 25-OH (recorded at 20 °C).

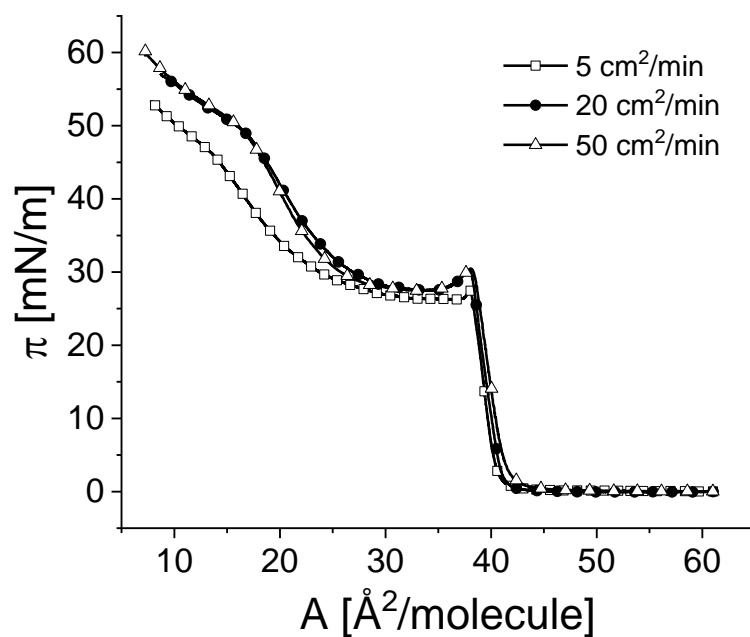

**Figure S5.** Influence of compression speed on surface pressure-area isotherms of 25-OH (recorded at 20 °C).

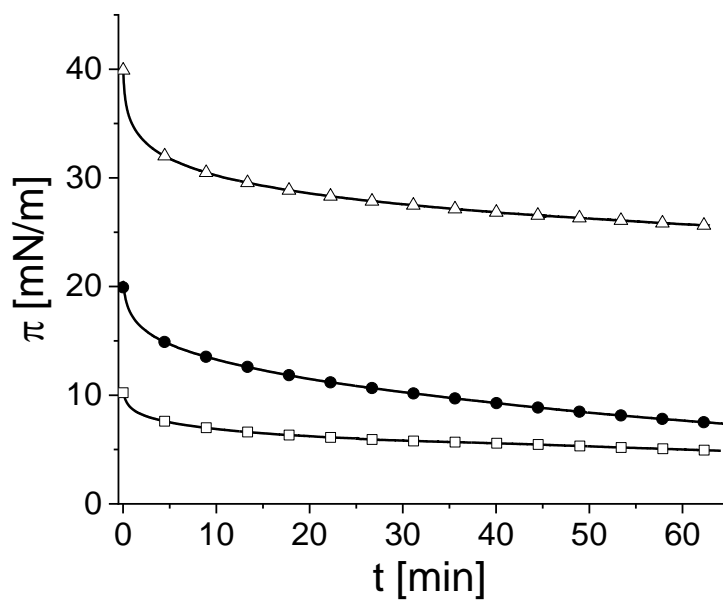

**Figure S6.** Stability of Langmuir monolayers from 25-OH (recorded at 20 °C).

A)

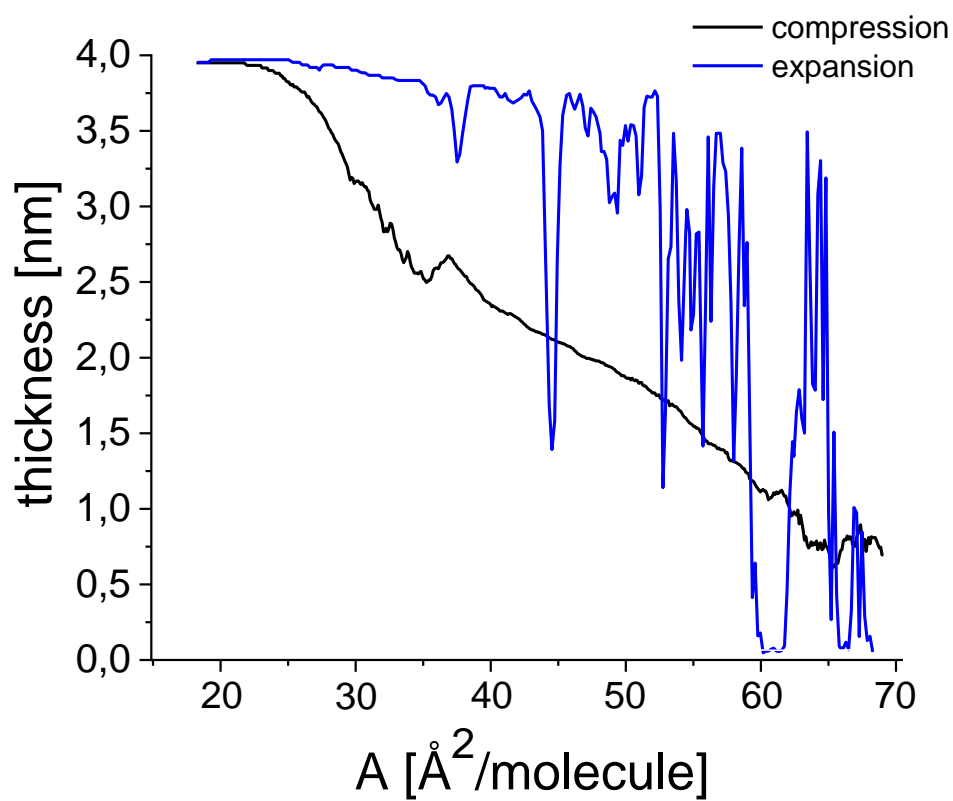

B)

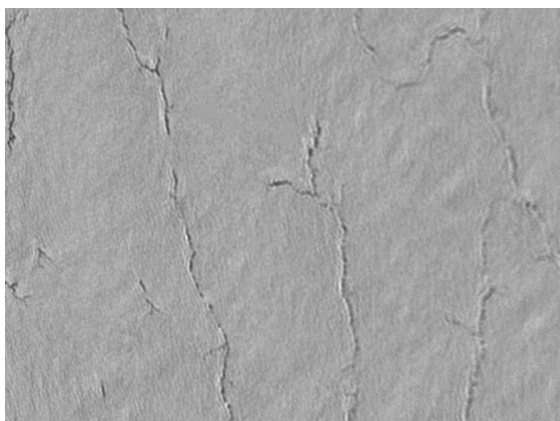

C)

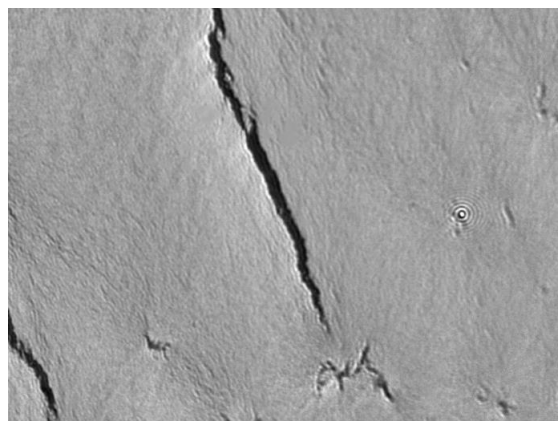

**Figure S7.** Thickness versus area per molecule plot registered during compression-expansion cycle for 25-OH monolayer spread on water at 20 °C (A). BAM textures of 25-OH films registered during expansion at different area per molecule values: 35 Å<sup>2</sup>/molecule (B) and 50 Å<sup>2</sup>/molecule (C).

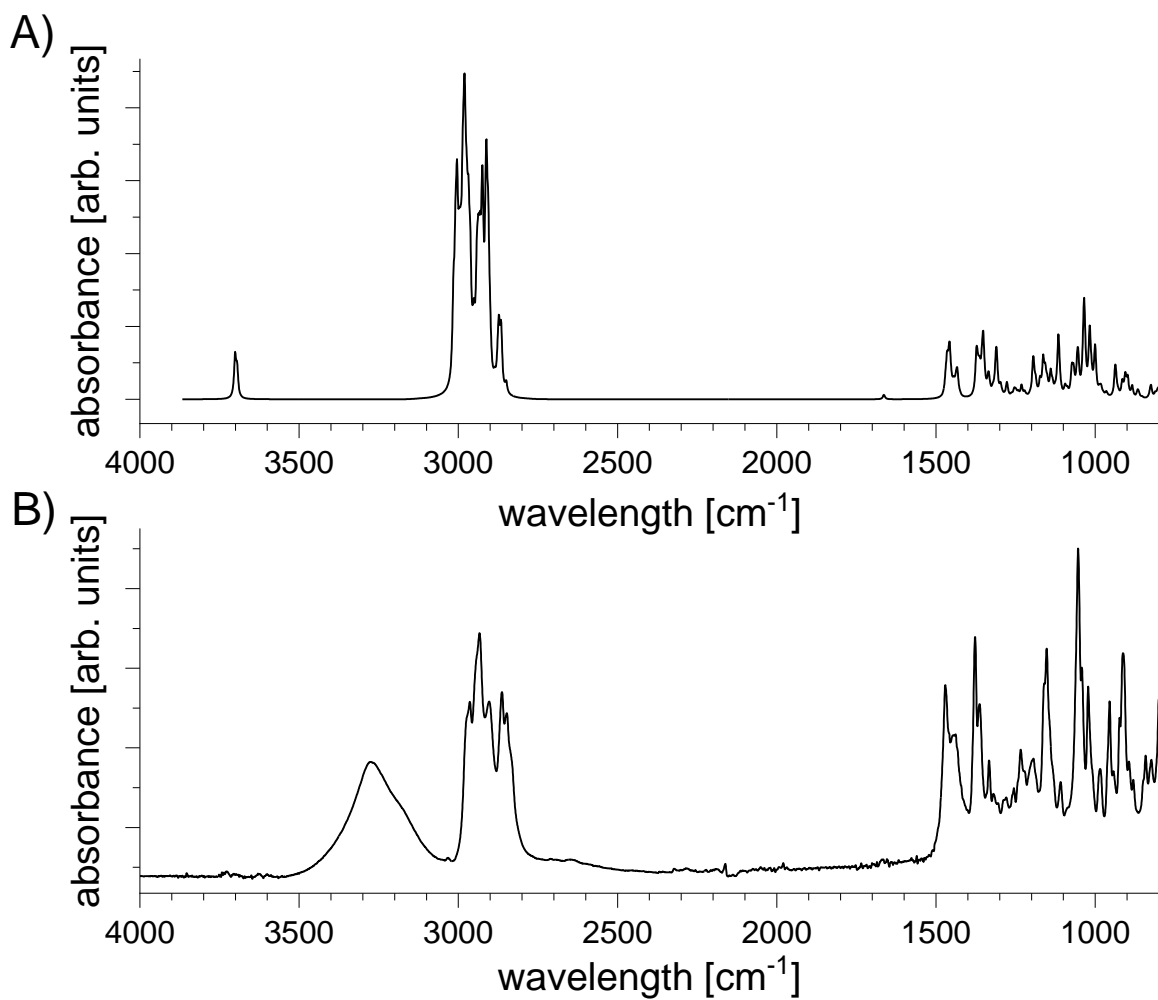

**Figure S8.** Comparison of IR spectra of 25-OH: calculated (A) and experimental ATR-FTIR (B).

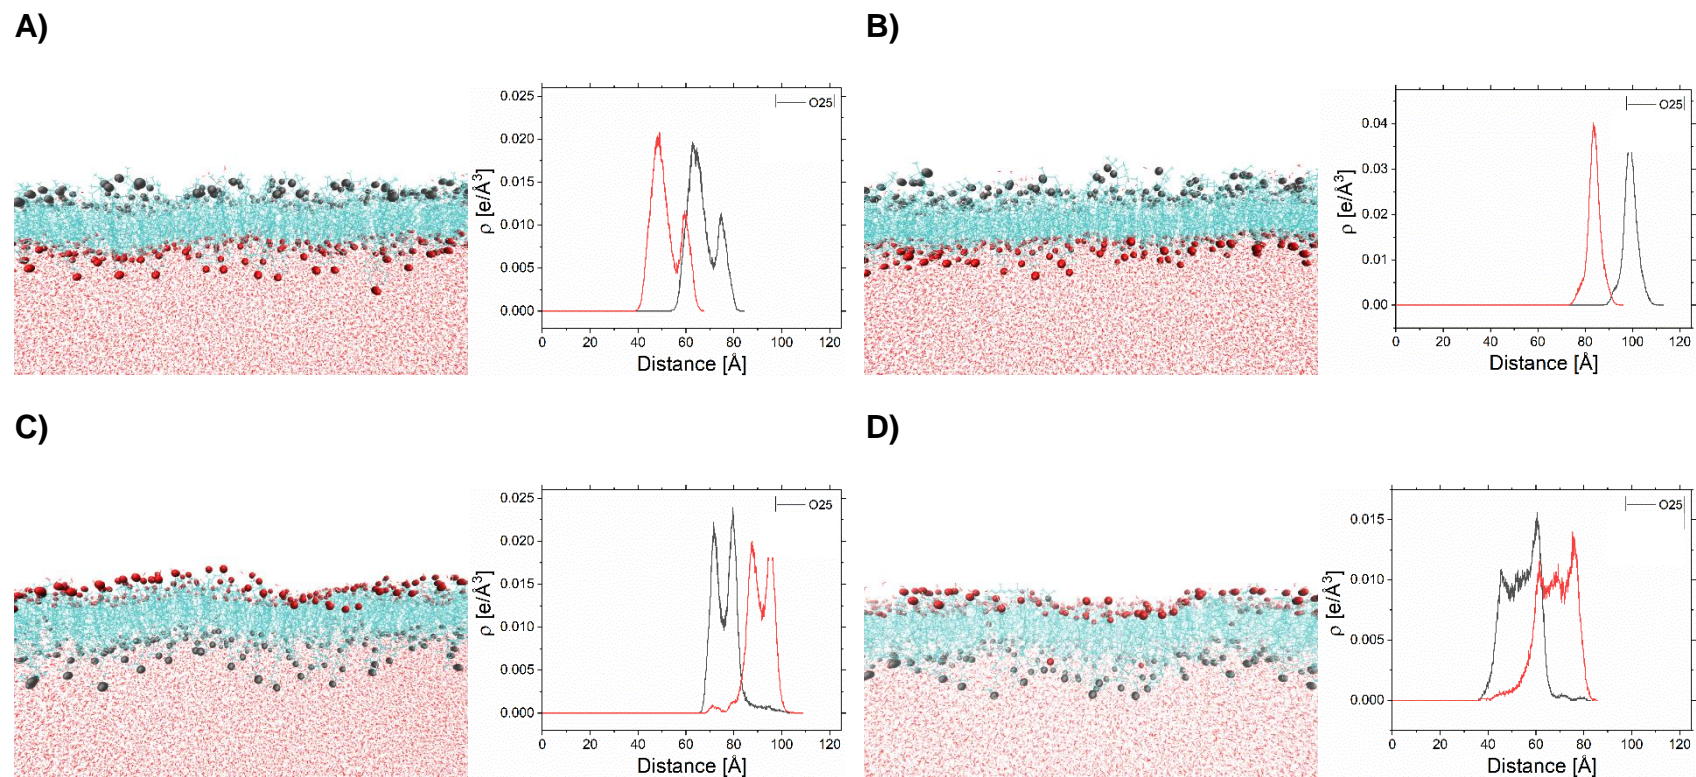

**Figure S9.** Models of monolayers and electron densities obtained after 110 ns production of molecular dynamics for systems with different mutual orientations: anchored with hydroxyl group at C(3) with surface pressure equal to 15 mN/m (A) or 35 mN/m (B) and anchored with hydroxyl group at C(25) with surface pressure equal to 15 mN/m (C) or 35 mN/m (D). Red balls and lines represent oxygen atom attached to C(3), dark grey represent oxygen atom attached to C(25).
